# Supplementary material for: Can Live-Remote Delivery of Supervised Group Exercise Reduce Cancer Health Disparities? Insights from a Community Readiness Assessment and Feasibility Trial of the Exercising Together Program in Underserved Oregon Counties
Source: Research Square preprint supplement (doi:10.21203/rs.3.rs-7152633/v1), 2025-07-31
Supplement: Supplementary file 1 [file 54dc316136659d9d95fea226.docx]

**Journal of Cancer Survivorship**

**Can Live-Remote Delivery of Supervised Group Exercise Reduce Cancer Health Disparities? Insights from a Community Readiness Assessment and Feasibility Trial of the Exercising TogetherÓ Program in Underserved Oregon Counties**

**Authors:** Deanne Tibbitts1, Christopher Chalmers1, Sydnee Stoyles2, Jackilen Shannon1, Nathan Dieckmann 2, Karen S. Lyons3, Kerri Winters-Stone1

**Affiliations**: 1Knight Cancer Institute, Oregon Health & Science University (OHSU), Portland, OR; 2School of Nursing, OHSU, Portland, OR; 3Connell School of Nursing, Boston College, Boston, MA

**Corresponding author**: Kerri Winters-Stone, PhD, FACSM, Knight Cancer Institute, Oregon Health & Science University. wintersk@ohsu.edu; 503-494-0813

**Supplementary table 1.** Intervention acceptability results.

**Supplementary table 2.** Baseline (T1), post-intervention (T2), and follow-up (T3) values for objective and patient-reported outcomes in the Exercising TogetherÓ arm.

Supplementary Table 1. Intervention acceptability results.

|  | Exercising Together | | Unsupervised Home-Based Program | |
| --- | --- | --- | --- | --- |
|  | **Survivor** | **Partner** | **Survivor** | **Partner** |
|  | **(n = 6)** | **(n = 7)** | **(n = 2)** | **(n = 2)** |
| Perception | **median or %** | **median or %** | **median or %** | **median or %** |
| Overall experience | 10 | 10 | 6.5 | 7.0 |
| *Accessibility* |  |  |  |  |
| Felt safe in class | 4.0 | 4.0 | N/A | N/A |
| Felt safe to exercise at home | N/A | N/A | 3.5 | 4.0 |
| Instructors were professional and credible (orientation/class) | 4.0 | 4.0 | 3.5 | 3.0 |
| Instructors were professional and credible (follow-up phone calls) | N/A | N/A | 3.0 | 3.0 |
| Instructors adapted/modified exercises (orientation/class) | 4.0 | 4.0 | 3.5 | 3.0 |
| Instructors adapted/modified exercises to my needs during the program | N/A | N/A | 3.5 | 3.0 |
| I like the flexibility of the home-based program | N/A | N/A | 3.5 | 3.5 |
| *Effectiveness* |  |  |  |  |
| Instructors were knowledgeable about cancer | 4.0 | 3.5 | 3.0 | 3.0 |
| Instructors were a good role model | 4.0 | 4.0 | 3.0 | 3.0 |
| Instructors were encouraging and supportive (orientation/class) | 4.0 | 4.0 | 3.5 | 3.0 |
| Instructors were encouraging and supportive (follow-up phone calls) | N/A | N/A | 3.0 | 3.0 |
| Classes helped motivation to exercise | 4.0 | 4.0 | N/A | N/A |
| The materials provided (exercise bands, DVD, manual) helped motivation to exercise | N/A | N/A | 3.0 | 3.0 |
| Follow-up phone calls helped motivation to exercise | N/A | N/A | 3.0 | 3.0 |
| Felt exercises improved my health and fitness | 4.0 | 4.0 | 3.5 | 3.5 |
| *Enjoyment* |  |  |  |  |
| Enjoyed the type of exercise done in video/manual/class | 4.0 | 4.0 | 3.0 | 3.5 |
| Enjoyed exercising with spouse/partner | 4.0 | 4.0 | N/A | N/A |
| Class environment was social and entertaining | 4.0 | 4.0 | N/A | N/A |
| *Virtual format* |  |  |  |  |
| Getting connected to virtual classes was easy | 3.5 | 3.0 | N/A | N/A |
| Connection issues disrupted my participation in class | 2.0 | 2.0 | N/A | N/A |
| Technical support was available when needed | 3.5 | 3.0 | N/A | N/A |
| There was adequate space in my home to perform exercises | 3.0 | 3.0 | N/A | N/A |
| Most helpful for getting connected to classes  Pre-class instructions  Staff support  Assistance from family member | 33%  83%  50% | 71%  57%  29% | N/A  N/A  N/A | N/A  N/A  N/A |
| What might improve connectivity to classes  Faster internet speed  Upgraded device (laptop or tablet) | 33%  33% | 14%  29% | N/A  N/A | N/A  N/A |
| *Preferred class setting* |  |  |  |  |
| Virtual | 83% | 57% | N/A | N/A |
| In-person | 17% | 43% | N/A | N/A |
| I prefer home-based programs compared to community based exercise classes | N/A | N/A | 3.5 | 3.5 |
| How often did you complete the home-based program with your spouse/partner? (1=Most of the time, 4=None of the time) | N/A | N/A | 1.0 | 1.0 |
| Would be more interested in a group exercise class specifically for cancer survivors and their spouse/partner compared to general exercise classes in the community | 33% | 57% | 0% | 0% |

| Characteristics | Survivor (n=6)b | | | |  | Partner (n=7)c | | | |
| --- | --- | --- | --- | --- | --- | --- | --- | --- | --- |
|  | **Baseline**  **(T1)** | **Post-intervention**  **(T2)** | **Follow-up**  **(T3)** | **Cohen’s d** |  | **Baseline**  **(T1)** | **Post-intervention**  **(T2)** | **Follow-up**  **(T3)** | **Cohen’s d** |
|  | **Mean (SD)** | **Mean (SD)** | **Mean (SD)** | **(T1-T2)/ (T2-T3)** |  | **Mean (SD)** | **Mean (SD)** | **Mean (SD)** | **(T1-T2)/ (T2-T3)** |
| Objective outcomes |  |  |  |  |  |  |  |  |  |
| Strength |  |  |  |  |  |  |  |  |  |
| Push-Up *(repetitions)*a | 1.2 (1.3) | 10.6 (6.7) | 6.6 (5.1) | **7.2**/-0.6 |  | 9.6 (9.0) | 17.7 (11.9) | 17.1 (13.8) | **0.9**/-0.1 |
| Plank *(s)* | 35.5 (23.7) | 78.0 (42.0) | 83.1 (41.4) | **1.8**/0.1 |  | 68.1 (40.0) | 129.6 (66.9) | 126.3 (54.2) | **1.5**/-0.1 |
| sPPB | 9.5 (1.1) | 10.7 (1.0) | 10.3 (1.5) | **1.1**/-0.3 |  | 9.6 (1.5) | 10.3 (1.5) | 10.6 (1.3) | 0.5/0.2 |
| 5-time Sit-to-Stand *(s)* | 14.7 (2.4) | 10.4 (2.0) | 11.9 (2.2) | **-1.8**/0.7 |  | 15.4 (4.6) | 11.5 (2.1) | 12.0 (2.2) | **-0.9**/0.2 |
| Patient-reported outcomes |  |  |  |  |  |  |  |  |  |
| SF-36 Physical Composite Score | 50.0 (4.3) | 50.9 (2.9) | 52.1 (2.7) | 0.2/0.4 |  | 47.4 (6.4) | 48.3 (8.5) | 47.7 (10.9) | 0.2/-0.1 |
| SF-36 Mental Composite Score | 55.8 (3.9) | 56.6 (3.9) | 56.4 (3.4) | 0.2/0.0 |  | 54.3 (6.8) | 53.7 (10.3) | 55.5 (7.4) | -0.1/0.2 |
| PROMIS Anxiety | 49.7 (3.8) | 42.7 (4.9) | 47.5 (3.7) | **-1.9/1.0** |  | 45.8 (7.8) | 44.9 (10.0) | 43.5 (8.5) | -0.1/-0.1 |
| CES-D Depressive Symptoms | 3.0 (2.1) | 3.0 (1.8) | 2.8 (1.2) | 0.0/-0.1 |  | 4.1 (4.2) | 4.0 (4.7) | 4.1 (5.7) | 0.0/0.0 |

Supplementary Table 2. Baseline (T1), post-intervention (T2), and follow-up (T3) values for objective and patient-reported outcomes in the Exercising TogetherÓ arm.

a n=5

b Survivor group includes 5 females, 1 male.

c Partner group includes 6 males, 1 female.

Effect size is described between baseline (T1) and post-intervention (T2). Large (0.8), very large (1.2), and huge (2.0) effect sizes are bolded. Decreases in 5-time Sit-to-Stand, PROMIS Anxiety, and CES-D Depressive Symptoms values indicate an improvement in these measures.
